# Supplementary material for: Self-assembly of polyoxometalate-based hybrid aggregates: from a monomer to dimers by changing the pH value of reaction systems
Source: Royal Society of Chemistry journal article supplement (doi:10.1039/c7nj02475d), 2017-01-01
Supplement: c7nj02475d1.pdf [file c7nj02475d1.pdf]

Electric Supplemental Information for:

**Self-assembly of polyoxometalate-based hybrid aggregates: from monomer to dimer by changing pH value of reaction systems**

Shaobin Li<sup>a,b</sup>, Li Zhang<sup>a</sup>, Dongfeng Chai<sup>a</sup>, Haijun Pang<sup>a,\*</sup> and Huiyuan Ma<sup>a,\*</sup>

*<sup>a</sup>Key Laboratory of Green Chemical Engineering and Technology of College of Heilongjiang Province, College of Chemical and Environmental Engineering, Harbin University of Science and Technology, Harbin 150040, China Tel.: 86-0451-86392716, Fax: 86-0451-86392716; E-mail: [panghj116@163.com](mailto:panghj116@163.com) (Pang H. J.), [mahy017@163.com](mailto:mahy017@163.com) (Ma H. Y.).*

*<sup>b</sup>College of Materials Science and Engineering, Qiqihar University, Qiqihar 161006, China.*

**Table of contents:**

1. **Table S1.** The BVS for the W and Cu atoms in compounds **1-3**.
2. **Table S2.** The IR stretching frequencies of compounds **1-3**.
3. **Fig. S1** The IR spectra of compounds **1-3**.
4. **Fig. S2** The TG curves of compounds **1-3**.
5. **Fig. S3** The simulative (black) and experimental (red) powder X-ray diffraction patterns for compounds **1-3**.
6. **Fig. S4** The plots of the anodic and the cathodic peak currents for wave III of **1-CPE** against scan rates.
7. **Fig. S5** The 100 consecutive CV cycles of the **1-CPE** at the scan rate of 0.1 V·s<sup>-1</sup>.

**Table S1.** The BVS for the W and Cu atoms in compounds **1-3**.

| Compounds | Atoms | BVS  | Oxidation states |
|-----------|-------|------|------------------|
| <b>1</b>  | Cu1   | 1.89 | II               |
|           | W1    | 5.76 | VI               |
|           | W2    | 5.81 | VI               |
|           | W3    | 5.92 | VI               |
|           | W4    | 5.93 | VI               |
|           | W5    | 5.87 | VI               |
|           | W6    | 5.83 | VI               |
|           | W7    | 5.77 | VI               |
|           | W8    | 5.72 | VI               |
|           | W9    | 5.79 | VI               |
|           | W10   | 5.83 | VI               |
|           | W11   | 5.86 | VI               |
|           | W12   | 5.69 | VI               |
|           | W13   | 5.71 | VI               |
|           | W14   | 5.83 | VI               |
|           | W15   | 5.77 | VI               |
|           | W16   | 5.86 | VI               |
|           | W17   | 5.78 | VI               |
| <b>2</b>  | Cu1   | 1.74 | II               |
|           | W1    | 5.86 | VI               |
|           | W2    | 5.71 | VI               |
|           | W3    | 5.82 | VI               |
|           | W4    | 5.83 | VI               |
|           | W5    | 5.77 | VI               |
|           | W6    | 5.81 | VI               |
|           | W7    | 5.83 | VI               |
|           | W8    | 5.77 | VI               |
|           | W9    | 5.72 | VI               |
|           | W10   | 5.85 | VI               |
|           | W11   | 5.76 | VI               |
|           | W12   | 5.89 | VI               |
|           | W13   | 5.81 | VI               |
|           | W14   | 5.81 | VI               |
|           | W15   | 5.87 | VI               |
|           | W16   | 5.76 | VI               |
|           | W17   | 5.89 | VI               |
| W18       | 5.87  | VI   |                  |
| <b>3</b>  | Cu1   | 1.86 | II               |
|           | W1    | 5.76 | VI               |
|           | W2    | 5.82 | VI               |

|     |      |    |
|-----|------|----|
| W3  | 5.86 | VI |
| W4  | 5.73 | VI |
| W5  | 5.87 | VI |
| W6  | 5.71 | VI |
| W7  | 5.73 | VI |
| W8  | 5.69 | VI |
| W9  | 5.77 | VI |
| W10 | 5.87 | VI |
| W11 | 5.77 | VI |
| W12 | 5.79 | VI |
| W13 | 5.71 | VI |
| W14 | 5.83 | VI |
| W15 | 5.77 | VI |
| W16 | 5.79 | VI |
| W17 | 5.83 | VI |
| W18 | 5.81 | VI |

**Table S2.** The IR stretching frequencies of compounds 1–3.

| Compounds | Stretching frequencies of POM (cm <sup>-1</sup> ) | Stretching frequencies of bimb ligand (cm <sup>-1</sup> ) |
|-----------|---------------------------------------------------|-----------------------------------------------------------|
| 1         | 1045, 936, 871, 778                               | 1638, 1534, 1275, 1198, 1151                              |
| 2         | 1046, 937, 873, 780                               | 1632, 1535, 1268, 1205, 1155                              |
| 3         | 1047, 938, 875, 776                               | 1629, 1531, 1271, 1211, 1157                              |

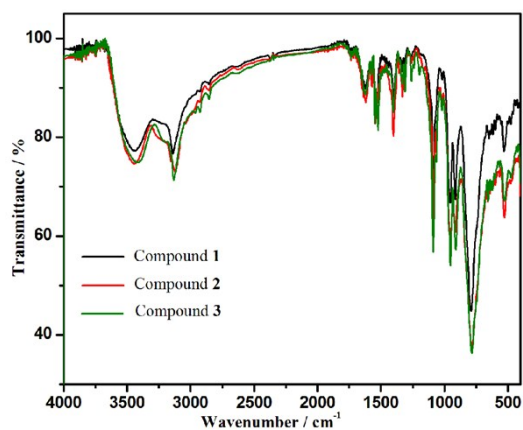

**Fig. S1** The IR spectra of compounds 1-3.

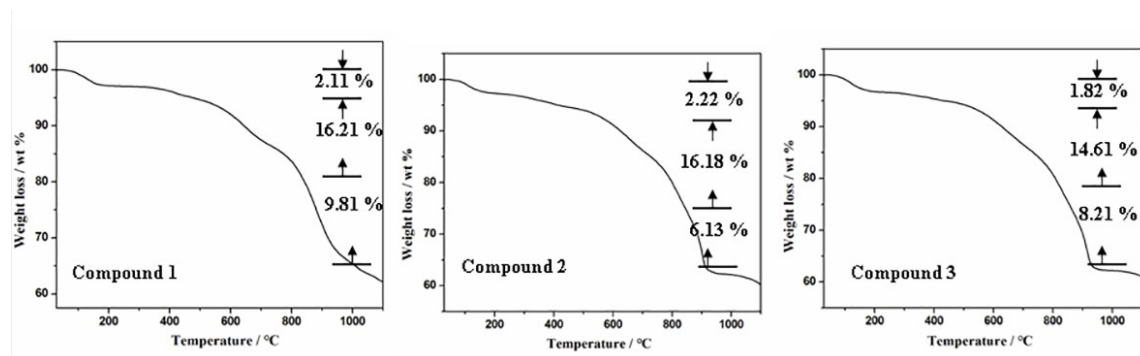

**Fig. S2** The TG curves of compounds 1-3.

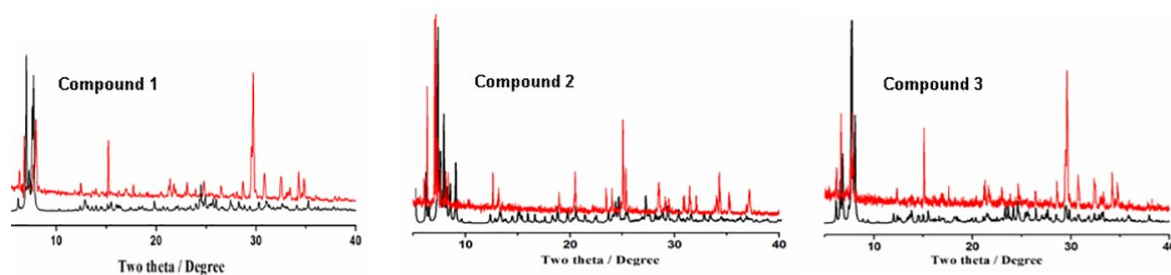

**Fig. S3** The simulative (black) and experimental (red) powder X-ray diffraction patterns for compounds 1-3.

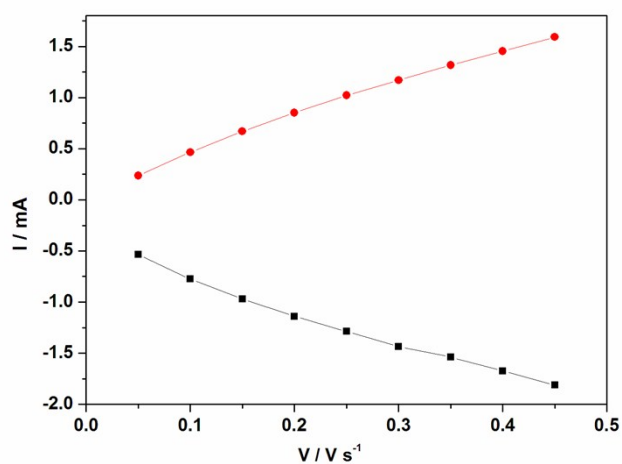

**Fig. S4** The plots of the anodic and the cathodic peak currents for wave III of 1-CPE against scan rates.

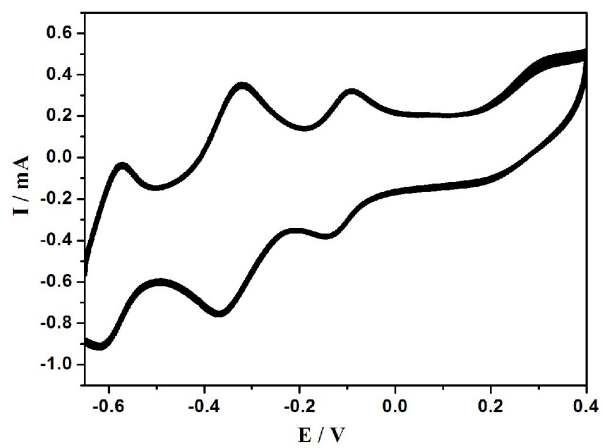

**Fig. S5** The 100 consecutive CV cycles of the **1-CPE** at the scan rate of  $0.1 \text{ V} \cdot \text{s}^{-1}$ .
